# Supplementary material for: The Pattern and Distribution of Deleterious Mutations in Maize
Source: PubMed Central journal article supplement (PMC3887532; doi:10.1534/g3.113.008870), 2013-11-26
Supplement: supp_g3.113.008870_008870SI.pdf [file supp_g3.113.008870_008870SI.pdf]

## The Pattern and Distribution of Deleterious Mutations in Maize

Sofiane Mezouk\*<sup>1</sup> and Jeffrey Ross-Ibarra<sup>†1,2</sup>

<sup>1</sup>Department of Plant Sciences, University of California Davis

<sup>2</sup>Center for Population Biology and Genome Center, University of California Davis

\*smezouk@ucdavis.edu

†rossibarra@ucdavis.edu

DOI: [10.1534/g3.113.008870](https://doi.org/10.1534/g3.113.008870)

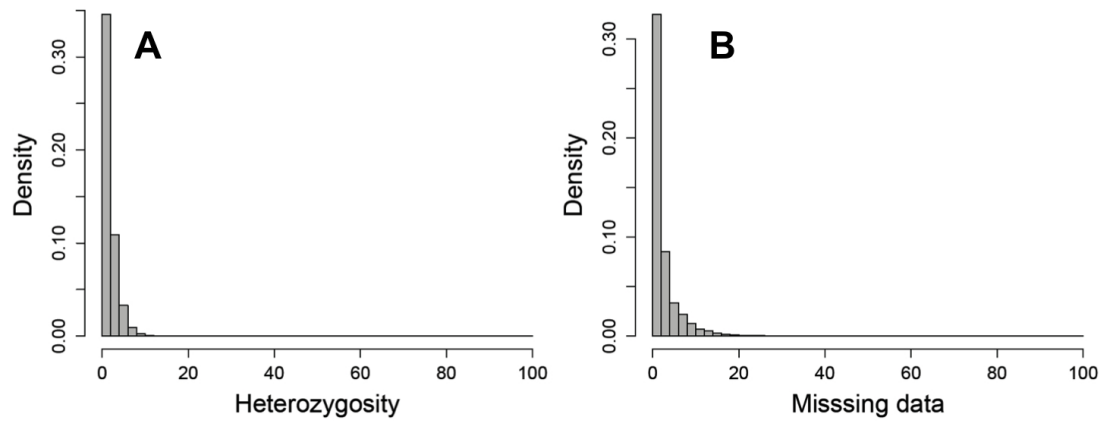

Figure S 1: Histograms of the percentage of (A) heterozygosity and (B) missing data per SNP

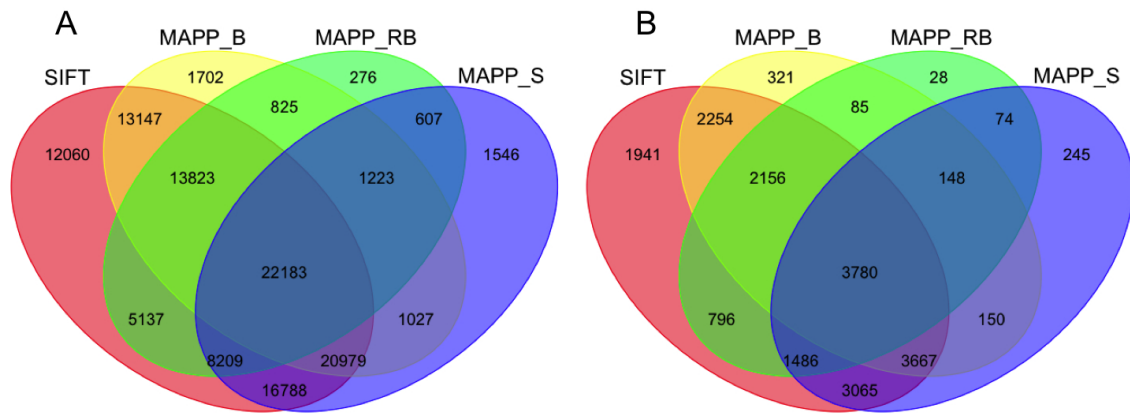

Figure S 2: Comparison of the number of predicted (A) amino acids and (B) genes, covered by SNP data. For MAPP, 3 gene sets were used: BLASTX (MAPP.B), reciprocal BLAST (MAPP.RB) and syntenic genes (MAPP.S)

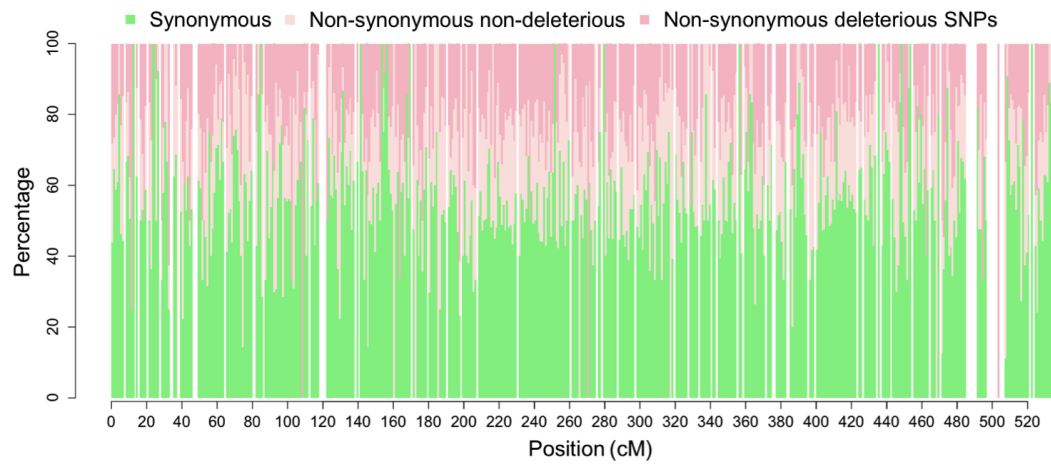

Figure S 3: Proportion of genic SNPs predicted to be synonymous, non-synonymous non-deleterious and non-synonymous deleterious in 1 cM windows along chromosome 1

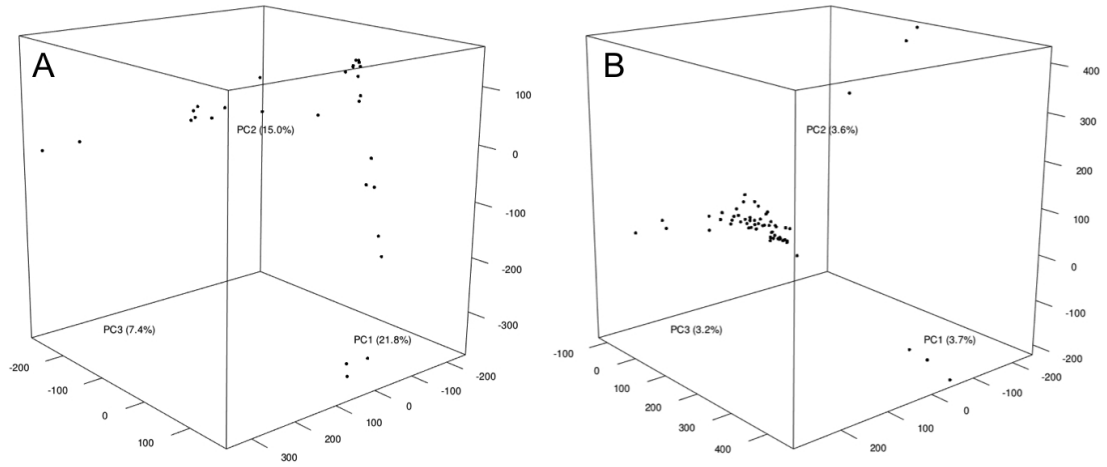

Figure S 4: Projection of the (A) stiff stalk and (B) mixed inbred lines on the three first axes of a principal component analysis

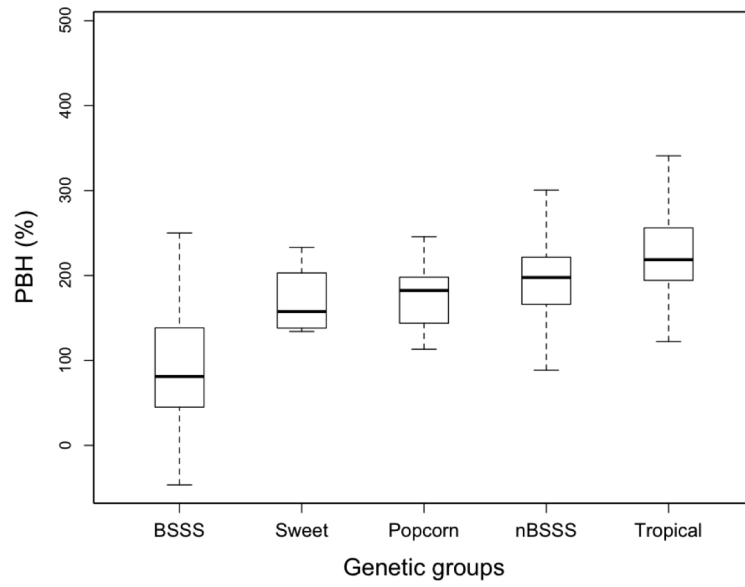

Figure S 5: Distribution of best parent heterosis (BPH) for plant yield in population A. BSSS and nBSSS indicate the stiff stalk and non-stiff stalk groups.

# File S1

## List of the inbred lines used

### PopulationA

B73, A214N, A441.5, A554, A556, A6, A619, A632, A634, A635, A641, A654, A659, A661, A679, A680, A682, AB28A, B10, B104, B105, B109, B115, B14A, B164, B2, B37, B46, B57, B64, B68, B73HTRHM, B75, B76, B77, B79, B84, B97, CH701.30, CH9, CI187.2, CI21E, CI28A, CI31A, CI3A, CI64, CI66, CI7, CI90C, CI91B, CM174, CM37, CM7, CML10, CML103, CML108, CML11, CML14, CML154Q, CML157Q, CML158Q, CML218, CML220, CML228, CML238, CML247, CML258, CML261, CML264, CML277, CML281, CML287, CML311, CML314, CML321, CML322, CML323, CML328, CML331, CML332, CML333, CML341, CML38, CML5, CML52, CML69, CML77, CML91, CML92, CMV3, CO255, D940Y, DE1, DE2, DE811, E2558W, EP1, F2834T, F44, F6, GA209, GT112, H105W, H84, H91, H95, H99, HI27, HP301, HY, I137TN, I205, I29, IA2132, IA5125, IDS28, IDS69, IDS91, IL101T, IL14H, IL677A, K148, K4, K55, K64, KI11, KI14, KI2021, KI21, KI3, KI43, KI44, KY21, KY226, KY228, L317, L578, M14, M162W, M37W, MEF156.55.2, MO17, MO18W, MO1W, MO24W, MO44, MO45, MO46, MOG, MP339, MS1334, MS153, MS71, MT42, N192, N28HT, N6, N7A, NC222, NC230, NC232, NC236, NC238, NC250, NC258, NC260, NC262, NC264, NC294, NC296, NC296A, NC298, NC300, NC302, NC304, NC306, NC310, NC314, NC318, NC320, NC324, NC326, NC328, NC33, NC336, NC338, NC342, NC344, NC346, NC348, NC350, NC352, NC354, NC356, NC358, NC360, NC362, NC364, NC366, NC368, ND246, OH40B, OH43E, OH603, OH7B, OS420, P39, PA762, PA875, PA880, PA91, R168, R177, R229, R4, SA24, SC357, SC55, SD44, SG1533, SG18, T232, T8, TX303, TZI10, TZI11, TZI16, TZI18, TZI25, TZI8, TZI9, U267Y, VA102, VA14, VA22, VA35, VA59, VA99, VAW6, W117HT, W153R, W182B, W64A, WD, 33.16, 38.11, X4226, X4722

### PopulationB

B73, MO17, 33.16, A188, A239, A619, A632, A634, A635, A641, A654, A661, A679, A680, A682, B103, B104, B109, B115, B14A, B37, B46, B52, B57, B64, B68, B73, B73HTRHM, B75, B76, B77, B79, B84, C103, C49A, CH701.30, CM105, CM174, CO125, DE.2, DE1, DE811, EP1, H105W, H49, H84, H91, H95, H99, HP301, IL101, IL14H, K148, KY226, M14, MEF156.55.2, MO44, MO45, MO46, MO47, MS1334, MS153, MS71, N192, N28HT, N6, NC262, NC264, NC294, NC306, NC310, NC314, NC324, NC326, NC328, NC342, NC364, ND246, OH43, OH43E,

OS420, P39, PA762, PA875, PA880, PA91, R168, R177, R4, SD40, SD44, SG18, VA102, VA14,  
VA17, VA22, VA35, VA85, VA99, W182B, W22, W64A, WF9, YU796.NS.



## File S2

### List of genomes used for reciprocal BLAST

*Aquilegia coerulea*, *Arabidopsis lyrata*, *Arabidopsis thaliana*, *Brachypodium distachyon*, *Brassica rapa*, *Capsella rubella*, *Carica papaya*, *Chlamydomonas reinhardtii*, *Citrus clementina*, *Citrus sinensis*, *Cucumis sativus*, *Eucalyptus grandis*, *Glycine max*, *Linum usitatissimum*, *Malus domestica*, *Manihot esculenta*, *Medicago truncatula*, *Mimulus guttatus*, *Oryza sativa*, *Panicum virgatum*, *Phaseolus vulgaris*, *Physcomitrella patens*, *Populus trichocarpa*, *Prunus persica*, *Ricinus communis*, *Selaginella moellendorffii*, *Setaria italica*, *Sorghum bicolor*, *Thellungiella halophila*, *Vitis vinifera*, *Volvox carteri*.

## File S3-4

Available for download as .zip files at <http://www.g3journal.org/lookup/suppl/doi:10.1534/g3.113.008870/-/DC1>

*File S3 Phenotypic data*

*File S4 SNP data*

Table S 1: List of Analyzed traits

| Traits                                | Abbreviation | Populations |
|---------------------------------------|--------------|-------------|
| Days to tasseling                     | DTT          | A           |
| Tassel length (cm)                    | TSLEN        | A           |
| Tassel branch count                   | TSLBHCNT     | A           |
| Tassel angle                          | TSANG        | A           |
| Plant height (cm)                     | PLTHT        | A & B       |
| Upper leaf angle                      | UPLFANG      | A           |
| Leaf width (cm)                       | LFWDT        | A           |
| Leaf length (cm)                      | LFLEN        | A           |
| Kernel height                         | KNLHGT       | A           |
| Kernel weight                         | TOTKNLWT     | A           |
| Stem puncture resistance (kg/section) | RPR          | A           |
| Plant yield (g/plant)                 | PLTYLD       | A           |
| Ear length (cm)                       | EARLGH       | A & B       |
| 10 kernel weight (g)                  | 10KWT        | A           |
| Cob diameter (cm)                     | COBDIA       | A & B       |
| Cob weight (g)                        | COBWT        | A & B       |
| Seed number per ear                   | SEEDNB       | B           |

Table S 2: Detailed results of the prediction of deleterious amino acids with MAPP, using the different gene sets, and with SIFT

| Gene sets                             | MAPP      |                  |                | SIFT       |
|---------------------------------------|-----------|------------------|----------------|------------|
|                                       | BLASTX    | Reciprocal BLAST | Syntenic genes | PSI-BLAST  |
| Total a.a. positions with predictions | 7,746,638 | 5,570,035        | 6,869,010      | 11,906,167 |
| Total number of genes                 | 20,348    | 11,918           | 17,957         | 31,843     |
| Number of positions covered by SNPs   | 74,909    | 52,283           | 72,562         | 112,326    |
| Number of genes covered by SNPs       | 12,561    | 8,553            | 12,615         | 19,145     |
| Monomorphic tolerated                 | 39,009    | 25,270           | 39,300         | 58,685     |
| Monomorphic not tolerated*            | 144       | 3470             | 14             | 387        |
| Polymorphic tolerated                 | 18,379    | 10,753           | 17,792         | 42,606     |
| Polymorphic not tolerated*            | 17,377    | 12,790           | 15456          | 10,648     |

\*Includes premature stop codons

Table S 3: Comparison of the results of MAPP predictions with the different gene sets.

| Gene sets        | BLASTX         | Reciprocal BLAST | Syntenic genes |
|------------------|----------------|------------------|----------------|
| BLASTX           | -              | 80.1%            | 78.2%          |
| Reciprocal BLAST | 38,054 (6,169) | -                | 79.8%          |
| Syntenic genes   | 45,412 (7,745) | 32,222 (5,488)   | -              |

The lower triangle indicates the number of amino acid positions predicted with two given gene sets and covered by GBS SNPs (number of genes between brackets); the upper triangle indicates the percentage of amino acids with the same predictions.

Table S 4: Total number of significant SNPs in genic regions ( $n$ ) and fold enrichment ( $f$ ) for SNPs with deleterious mutations in population B. Numbers marked with “\*” are statistically significant (Fisher’s exact test  $p$ -value < 0.05).

| Traits | Inbreds |      | BPH_B73 |       | MPH_B73 |       | BPH_Mo17 |      | MPH_Mo17 |      |
|--------|---------|------|---------|-------|---------|-------|----------|------|----------|------|
|        | $n$     | $f$  | $n$     | $f$   | $n$     | $f$   | $n$      | $f$  | $n$      | $f$  |
| 10KWT  | 310     | 0.77 | 404     | 1.17* | 257     | 0.86  | 698      | 0.83 | 723      | 0.98 |
| COBWT  | 313     | 0.62 | 941     | 1.15* | 387     | 0.69  | 257      | 1.33 | 532      | 0.95 |
| COBDIA | 226     | 1.49 | 159     | 1.25* | 236     | 1.06* | 349      | 0.78 | 615      | 0.72 |
| COBLEN | 598     | 1.08 | 239     | 1.20* | 97      | 0.24  | 280      | 1.08 | 140      | 0.92 |
| SEEDWT | 362     | 1.09 | 378     | 1.32* | 118     | 1.23* | 1043     | 0.92 | 1080     | 0.78 |
| SEEDNB | 373     | 0.99 | 320     | 0.86  | 251     | 0.92  | 348      | 1.06 | 454      | 0.82 |
| PLTHT  | 505     | 1.02 | 261     | 0.89  | 143     | 1.45* | 1022     | 1.08 | 156      | 1.16 |

Table S 5: Total number of genes with significant SNPs ( $n$ ) and fold enrichment for genes with predicted deleterious SNPs ( $f$ ) in population B. Numbers marked with “\*” are statistically significant (Fisher’s exact test  $p$ -value < 0.05).

| Traits | Inbreds |      | BPH_B73 |      | MPH_B73 |      | BPH_Mo17 |      | MPH_Mo17 |      |
|--------|---------|------|---------|------|---------|------|----------|------|----------|------|
|        | $n$     | $f$  | $n$     | $f$  | $n$     | $f$  | $n$      | $f$  | $n$      | $f$  |
| 10KWT  | 73      | 1.17 | 169     | 1.14 | 95      | 1.11 | 246      | 1.11 | 274      | 1.11 |
| COBWT  | 71      | 1.13 | 316     | 1.08 | 128     | 1.04 | 94       | 1.10 | 204      | 1.10 |
| COBDIA | 81      | 1.07 | 57      | 1.08 | 86      | 1.11 | 134      | 1.03 | 234      | 1.14 |
| COBLEN | 203     | 1.09 | 89      | 1.24 | 30      | 1.17 | 110      | 1.17 | 51       | 1.21 |
| SEEDWT | 138     | 1.10 | 146     | 1.14 | 50      | 0.97 | 371      | 1.09 | 389      | 1.09 |
| SEEDNB | 106     | 1.15 | 128     | 1.13 | 116     | 0.98 | 130      | 1.12 | 166      | 1.09 |
| PLTHT  | 169     | 1.15 | 112     | 1.09 | 65      | 1.13 | 348      | 1.15 | 65       | 1.15 |
