# Supplementary material for: The Pattern and Distribution of Deleterious Mutations in Maize
Source: PubMed Central journal article supplement (PMC3887532; doi:10.1534/g3.113.008870), 2013-11-26
Supplement: supp_g3.113.008870_FigureS1.pdf [file supp_g3.113.008870_FigureS1.pdf]

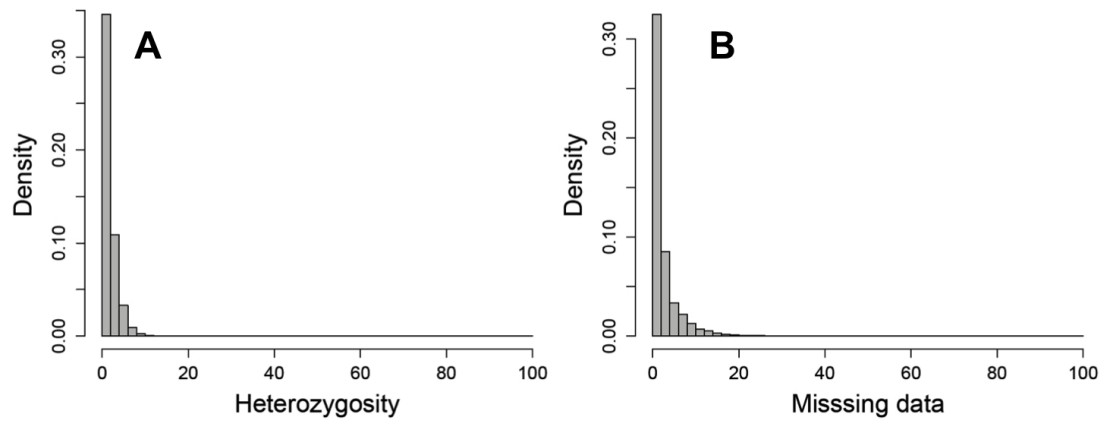

Figure S 1: Histograms of the percentage of (A) heterozygosity and (B) missing data per SNP
