# Supplementary material for: The Pattern and Distribution of Deleterious Mutations in Maize
Source: PubMed Central journal article supplement (PMC3887532; doi:10.1534/g3.113.008870), 2013-11-26
Supplement: supp_g3.113.008870_FigureS2.pdf [file supp_g3.113.008870_FigureS2.pdf]

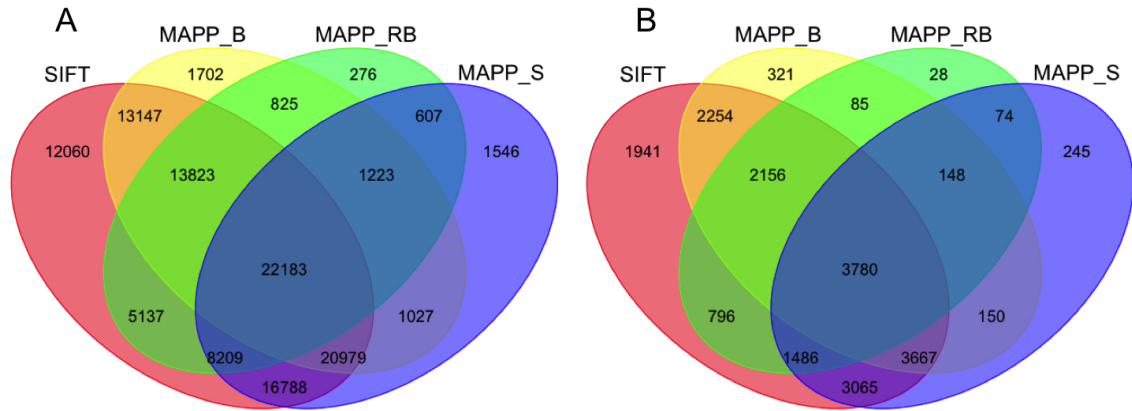

Figure S 2: Comparison of the number of predicted (A) amino acids and (B) genes, covered by SNP data. For MAPP, 3 gene sets were used: BLASTX (MAPP.B), reciprocal BLAST (MAPP.RB) and syntenic genes (MAPP.S)
