# Supplementary material for: The Pattern and Distribution of Deleterious Mutations in Maize
Source: PubMed Central journal article supplement (PMC3887532; doi:10.1534/g3.113.008870), 2013-11-26
Supplement: supp_g3.113.008870_FigureS5.pdf [file supp_g3.113.008870_FigureS5.pdf]

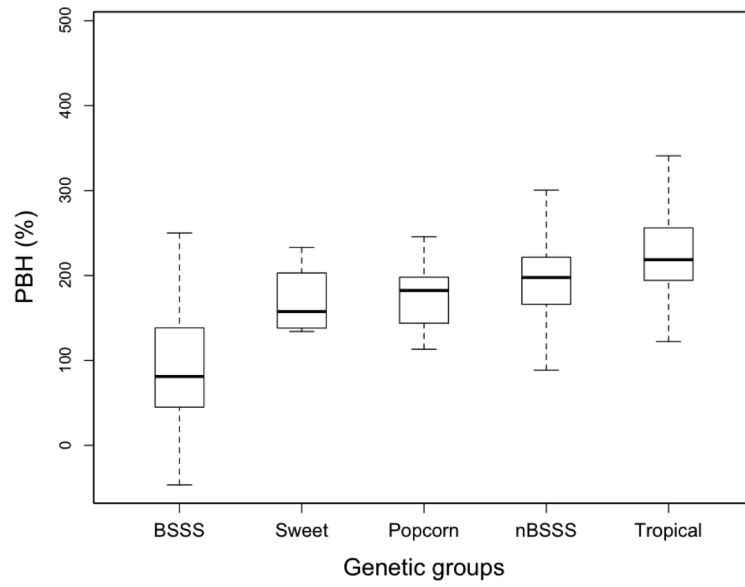

Figure S 5: Distribution of best parent heterosis (BPH) for plant yield in population A. BSSS and nBSSS indicate the stiff stalk and non-stiff stalk groups.
