# Supplementary material for: The Pattern and Distribution of Deleterious Mutations in Maize
Source: PubMed Central journal article supplement (PMC3887532; doi:10.1534/g3.113.008870), 2013-11-26
Supplement: supp_g3.113.008870_FileS2.pdf [file supp_g3.113.008870_FileS2.pdf]

## File S2

### List of genomes used for reciprocal BLAST

*Aquilegia coerulea*, *Arabidopsis lyrata*, *Arabidopsis thaliana*, *Brachypodium distachyon*, *Brassica rapa*, *Capsella rubella*, *Carica papaya*, *Chlamydomonas reinhardtii*, *Citrus clementina*, *Citrus sinensis*, *Cucumis sativus*, *Eucalyptus grandis*, *Glycine max*, *Linum usitatissimum*, *Malus domestica*, *Manihot esculenta*, *Medicago truncatula*, *Mimulus guttatus*, *Oryza sativa*, *Panicum virgatum*, *Phaseolus vulgaris*, *Physcomitrella patens*, *Populus trichocarpa*, *Prunus persica*, *Ricinus communis*, *Selaginella moellendorffii*, *Setaria italica*, *Sorghum bicolor*, *Thellungiella halophila*, *Vitis vinifera*, *Volvox carteri*.
