# Supplementary material for: The Pattern and Distribution of Deleterious Mutations in Maize
Source: PubMed Central journal article supplement (PMC3887532; doi:10.1534/g3.113.008870), 2013-11-26
Supplement: supp_g3.113.008870_TableS1.pdf [file supp_g3.113.008870_TableS1.pdf]

Table S 1: List of Analyzed traits

| Traits                                | Abbreviation | Populations |
|---------------------------------------|--------------|-------------|
| Days to tasseling                     | DTT          | A           |
| Tassel length (cm)                    | TSLEN        | A           |
| Tassel branch count                   | TSLBHCNT     | A           |
| Tassel angle                          | TSANG        | A           |
| Plant height (cm)                     | PLTHT        | A & B       |
| Upper leaf angle                      | UPLFANG      | A           |
| Leaf width (cm)                       | LFWDT        | A           |
| Leaf length (cm)                      | LFLEN        | A           |
| Kernel height                         | KNLHGT       | A           |
| Kernel weight                         | TOTKNLWT     | A           |
| Stem puncture resistance (kg/section) | RPR          | A           |
| Plant yield (g/plant)                 | PLTYLD       | A           |
| Ear length (cm)                       | EARLGH       | A & B       |
| 10 kernel weight (g)                  | 10KWT        | A           |
| Cob diameter (cm)                     | COBDIA       | A & B       |
| Cob weight (g)                        | COBWT        | A & B       |
| Seed number per ear                   | SEEDNB       | B           |
