# Supplementary material for: The Pattern and Distribution of Deleterious Mutations in Maize
Source: PubMed Central journal article supplement (PMC3887532; doi:10.1534/g3.113.008870), 2013-11-26
Supplement: supp_g3.113.008870_TableS2.pdf [file supp_g3.113.008870_TableS2.pdf]

Table S 2: Detailed results of the prediction of deleterious amino acids with MAPP, using the different gene sets, and with SIFT

| Gene sets                             | MAPP      |                  |                | SIFT       |
|---------------------------------------|-----------|------------------|----------------|------------|
|                                       | BLASTX    | Reciprocal BLAST | Syntenic genes | PSI-BLAST  |
| Total a.a. positions with predictions | 7,746,638 | 5,570,035        | 6,869,010      | 11,906,167 |
| Total number of genes                 | 20,348    | 11,918           | 17,957         | 31,843     |
| Number of positions covered by SNPs   | 74,909    | 52,283           | 72,562         | 112,326    |
| Number of genes covered by SNPs       | 12,561    | 8,553            | 12,615         | 19,145     |
| Monomorphic tolerated                 | 39,009    | 25,270           | 39,300         | 58,685     |
| Monomorphic not tolerated*            | 144       | 3470             | 14             | 387        |
| Polymorphic tolerated                 | 18,379    | 10,753           | 17,792         | 42,606     |
| Polymorphic not tolerated*            | 17,377    | 12,790           | 15456          | 10,648     |

\*Includes premature stop codons
