# Supplementary material for: The Pattern and Distribution of Deleterious Mutations in Maize
Source: PubMed Central journal article supplement (PMC3887532; doi:10.1534/g3.113.008870), 2013-11-26
Supplement: supp_g3.113.008870_TableS3.pdf [file supp_g3.113.008870_TableS3.pdf]

Table S 3: Comparison of the results of MAPP predictions with the different gene sets.

| Gene sets        | BLASTX         | Reciprocal BLAST | Syntenic genes |
|------------------|----------------|------------------|----------------|
| BLASTX           | -              | 80.1%            | 78.2%          |
| Reciprocal BLAST | 38,054 (6,169) | -                | 79.8%          |
| Syntenic genes   | 45,412 (7,745) | 32,222 (5,488)   | -              |

The lower triangle indicates the number of amino acid positions predicted with two given gene sets and covered by GBS SNPs (number of genes between brackets); the upper triangle indicates the percentage of amino acids with the same predictions.
