# Supplementary material for: The Pattern and Distribution of Deleterious Mutations in Maize
Source: PubMed Central journal article supplement (PMC3887532; doi:10.1534/g3.113.008870), 2013-11-26
Supplement: supp_g3.113.008870_TableS4.pdf [file supp_g3.113.008870_TableS4.pdf]

Table S 4: Total number of significant SNPs in genic regions ( $n$ ) and fold enrichment ( $f$ ) for SNPs with deleterious mutations in population B. Numbers marked with “\*” are statistically significant (Fisher’s exact test  $p$ -value < 0.05).

| Traits | Inbreds |      | BPH_B73 |       | MPH_B73 |       | BPH_Mo17 |      | MPH_Mo17 |      |
|--------|---------|------|---------|-------|---------|-------|----------|------|----------|------|
|        | $n$     | $f$  | $n$     | $f$   | $n$     | $f$   | $n$      | $f$  | $n$      | $f$  |
| 10KWT  | 310     | 0.77 | 404     | 1.17* | 257     | 0.86  | 698      | 0.83 | 723      | 0.98 |
| COBWT  | 313     | 0.62 | 941     | 1.15* | 387     | 0.69  | 257      | 1.33 | 532      | 0.95 |
| COBDIA | 226     | 1.49 | 159     | 1.25* | 236     | 1.06* | 349      | 0.78 | 615      | 0.72 |
| COBLEN | 598     | 1.08 | 239     | 1.20* | 97      | 0.24  | 280      | 1.08 | 140      | 0.92 |
| SEEDWT | 362     | 1.09 | 378     | 1.32* | 118     | 1.23* | 1043     | 0.92 | 1080     | 0.78 |
| SEEDNB | 373     | 0.99 | 320     | 0.86  | 251     | 0.92  | 348      | 1.06 | 454      | 0.82 |
| PLTHT  | 505     | 1.02 | 261     | 0.89  | 143     | 1.45* | 1022     | 1.08 | 156      | 1.16 |
