# Supplementary material for: The Pattern and Distribution of Deleterious Mutations in Maize
Source: PubMed Central journal article supplement (PMC3887532; doi:10.1534/g3.113.008870), 2013-11-26
Supplement: supp_g3.113.008870_TableS5.pdf [file supp_g3.113.008870_TableS5.pdf]

Table S 5: Total number of genes with significant SNPs ( $n$ ) and fold enrichment for genes with predicted deleterious SNPs ( $f$ ) in population B. Numbers marked with “\*” are statistically significant (Fisher’s exact test  $p$ -value < 0.05).

| Traits | Inbreds |      | BPH_B73 |      | MPH_B73 |      | BPH_Mo17 |      | MPH_Mo17 |      |
|--------|---------|------|---------|------|---------|------|----------|------|----------|------|
|        | $n$     | $f$  | $n$     | $f$  | $n$     | $f$  | $n$      | $f$  | $n$      | $f$  |
| 10KWT  | 73      | 1.17 | 169     | 1.14 | 95      | 1.11 | 246      | 1.11 | 274      | 1.11 |
| COBWT  | 71      | 1.13 | 316     | 1.08 | 128     | 1.04 | 94       | 1.10 | 204      | 1.10 |
| COBDIA | 81      | 1.07 | 57      | 1.08 | 86      | 1.11 | 134      | 1.03 | 234      | 1.14 |
| COBLEN | 203     | 1.09 | 89      | 1.24 | 30      | 1.17 | 110      | 1.17 | 51       | 1.21 |
| SEEDWT | 138     | 1.10 | 146     | 1.14 | 50      | 0.97 | 371      | 1.09 | 389      | 1.09 |
| SEEDNB | 106     | 1.15 | 128     | 1.13 | 116     | 0.98 | 130      | 1.12 | 166      | 1.09 |
| PLTHT  | 169     | 1.15 | 112     | 1.09 | 65      | 1.13 | 348      | 1.15 | 65       | 1.15 |
